# Supplementary material for: Quantitative expression of MMPs 2, 9, 14, and collagen IV in LCIS and paired normal breast tissue
Source: PubMed Central journal article supplement (PMC6748975; doi:10.1038/s41598-019-48602-6), 2019-09-17
Supplement: 41598_2019_48602_MOESM1_ESM.pdf [file 41598_2019_48602_MOESM1_ESM.pdf]

## **Supplementary Information File**

Title: Quantitative expression of MMPs 2, 9, 14, and collagen IV in LCIS and paired normal breast tissue

Authors: Sarah J. Nyante, Tengeng Wang, Xianming Tan, Emily F. Ozdowski, Thomas J. Lawton

Supplementary Table S1. Characteristics of 64 patients diagnosed with lobular carcinoma *in situ* (LCIS) at a single institution, 2004-14.

| Characteristic                        | Overall (N=64) |    | Case Has Paired Normal Breast Tissue? |    |           |    | P-Value |
|---------------------------------------|----------------|----|---------------------------------------|----|-----------|----|---------|
|                                       |                |    | Yes (N=44)                            |    | No (N=20) |    |         |
|                                       | N              | %  | N                                     | %  | N         | %  |         |
| Age at surgery (years) <sup>a</sup>   |                |    |                                       |    |           |    |         |
| ≤ 50                                  | 27             | 42 | 22                                    | 50 | 5         | 25 | 0.10    |
| > 50                                  | 37             | 58 | 22                                    | 50 | 15        | 75 |         |
| Race                                  |                |    |                                       |    |           |    |         |
| White                                 | 44             | 70 | 32                                    | 73 | 12        | 63 | 0.55    |
| Nonwhite                              | 19             | 30 | 12                                    | 27 | 7         | 37 |         |
| Unknown                               | 1              |    |                                       |    | 1         |    |         |
| Menopausal status                     |                |    |                                       |    |           |    |         |
| Premenopausal                         | 27             | 42 | 20                                    | 45 | 7         | 35 | 0.59    |
| Postmenopausal                        | 37             | 58 | 24                                    | 55 | 13        | 65 |         |
| Parous                                |                |    |                                       |    |           |    |         |
| No                                    | 13             | 21 | 10                                    | 23 | 3         | 16 | 0.74    |
| Yes                                   | 50             | 79 | 34                                    | 77 | 16        | 84 |         |
| Unknown                               | 1              |    |                                       |    | 1         |    |         |
| Age at menarche (years)               |                |    |                                       |    |           |    |         |
| ≤ 12                                  | 29             | 54 | 18                                    | 51 | 11        | 58 | 0.78    |
| > 12                                  | 25             | 46 | 17                                    | 49 | 8         | 42 |         |
| Unknown                               | 10             |    | 9                                     |    | 1         |    |         |
| BMI (kg/m <sup>2</sup> ) <sup>b</sup> |                |    |                                       |    |           |    |         |
| < 25                                  | 20             | 35 | 16                                    | 41 | 4         | 22 | 0.41    |
| 25 to < 30                            | 14             | 25 | 9                                     | 23 | 5         | 28 |         |
| ≥ 30                                  | 23             | 40 | 14                                    | 36 | 9         | 50 |         |
| Unknown                               | 7              |    | 5                                     |    | 2         |    |         |
| Alcohol use                           |                |    |                                       |    |           |    |         |
| None                                  | 28             | 51 | 17                                    | 45 | 11        | 65 | 0.17    |
| Less than once per day                | 16             | 29 | 14                                    | 37 | 2         | 12 |         |
| Once or more per day                  | 11             | 20 | 7                                     | 18 | 4         | 24 |         |

|                                  |    |    |    |    |    |    |       |
|----------------------------------|----|----|----|----|----|----|-------|
| Unknown                          | 9  |    |    |    |    |    |       |
| Hormone use                      |    |    |    |    |    |    |       |
| Never                            | 45 | 73 | 34 | 79 | 11 | 58 | 0.21  |
| Former user                      | 8  | 13 | 4  | 9  | 4  | 21 |       |
| Current user                     | 9  | 15 | 5  | 12 | 4  | 21 |       |
| Unknown                          | 2  |    |    |    |    |    |       |
| Chemoprevention use <sup>c</sup> |    |    |    |    |    |    |       |
| No                               | 57 | 89 | 38 | 86 | 19 | 95 | 0.42  |
| Yes                              | 7  | 11 | 6  | 14 | 1  | 5  |       |
| Family history of breast cancer  |    |    |    |    |    |    |       |
| No                               | 49 | 78 | 35 | 80 | 14 | 74 | 0.74  |
| Yes                              | 14 | 22 | 9  | 20 | 5  | 26 |       |
| Unknown                          | 1  |    |    |    | 1  |    |       |
| Mammographic density             |    |    |    |    |    |    |       |
| Non-dense                        | 23 | 42 | 15 | 41 | 8  | 44 | 1.00  |
| Dense                            | 32 | 58 | 22 | 59 | 10 | 56 |       |
| Unknown                          | 9  |    | 7  |    | 2  |    |       |
| Surgery type                     |    |    |    |    |    |    |       |
| Needle-core biopsy               | 16 | 25 | 1  | 2  | 15 | 75 | <0.01 |
| Surgical biopsy/lumpectomy       | 35 | 55 | 31 | 70 | 4  | 20 |       |
| Mastectomy                       | 13 | 20 | 12 | 27 | 1  | 5  |       |
| Histologic Subtype               |    |    |    |    |    |    |       |
| Classic                          | 55 | 86 | 40 | 91 | 15 | 75 | 0.22  |
| Florid                           | 7  | 11 | 3  | 7  | 4  | 20 |       |
| Pleomorphic                      | 2  | 3  | 1  | 2  | 1  | 5  |       |

<sup>a</sup>Among all subjects (in years): mean - 53; standard deviation - 9.6; median - 52; range 32 to 76

<sup>b</sup>Among all subjects (in kg/m<sup>2</sup>): mean - 28.2; standard deviation - 6.6; median - 27.8; range 16.9 to 45.8

<sup>c</sup>Among all subject: tamoxifen, N=5, anastrozole, N=1; raloxifene, N=1

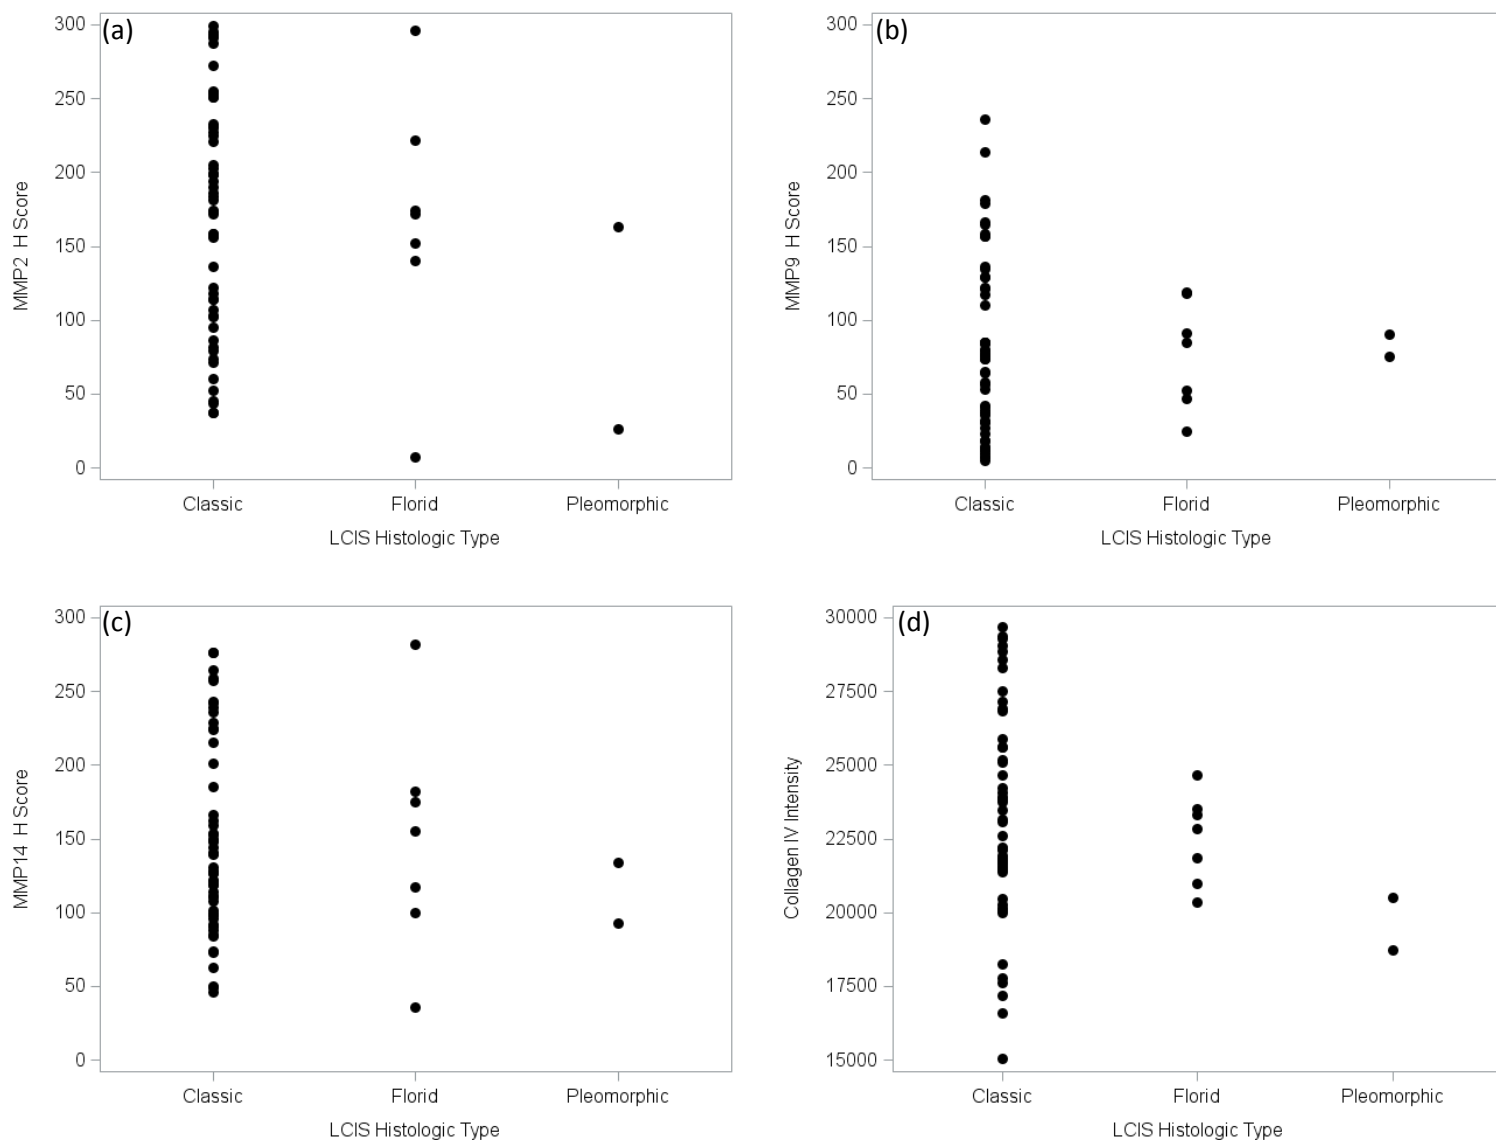

**Supplementary Figure S1. Marker distribution according to LCIS histologic subtype.** The data shown represent marker expression measured within the LCIS (n=64). For MMP2 (panel a), MMP9 (panel b), MMP14 (panel c), and Collagen IV (panel d), marker distributions in florid LCIS or pleomorphic LCIS did not differ from the distributions in classic LCIS.

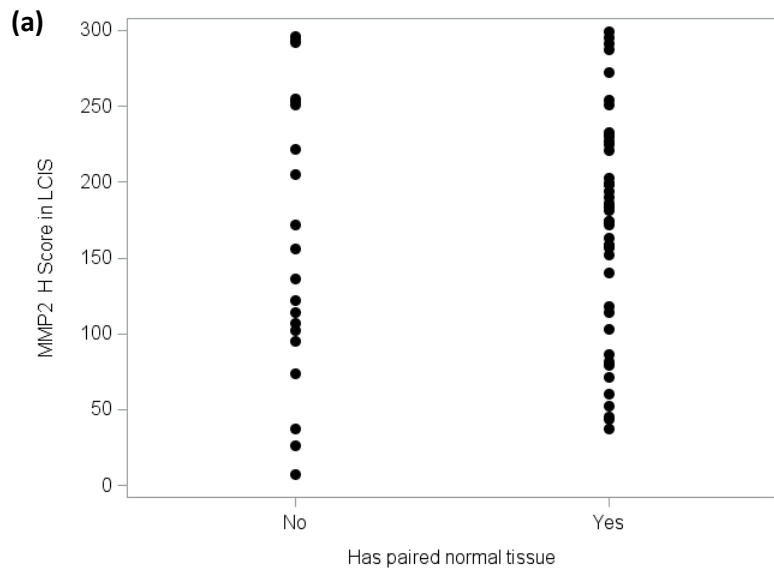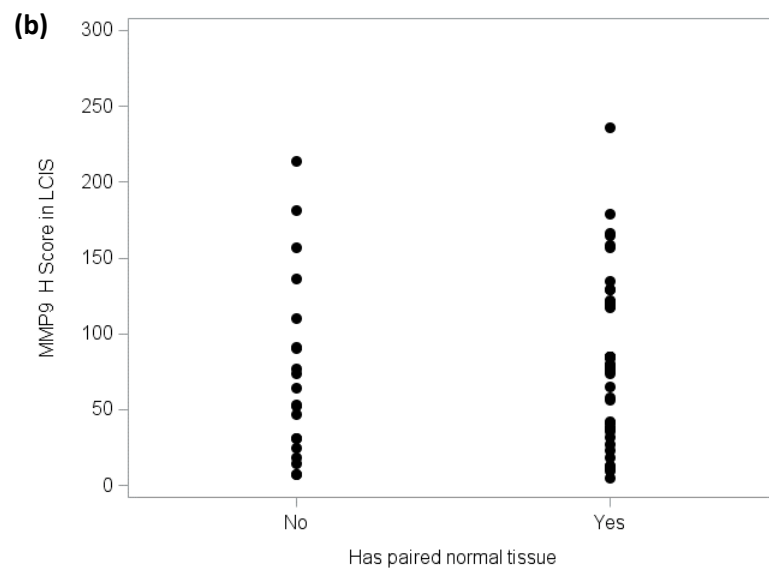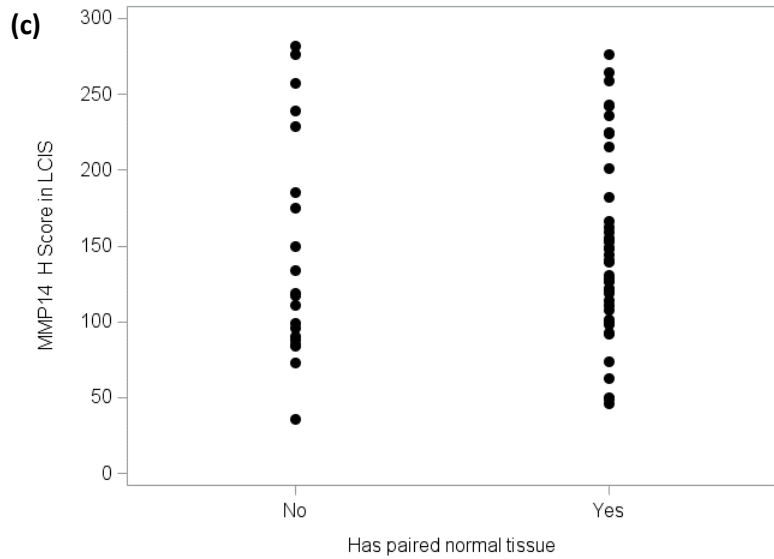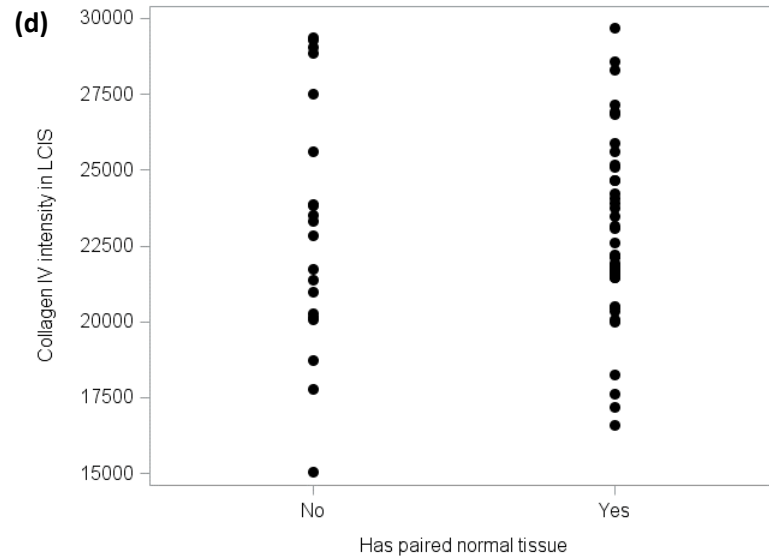

| (e)                   | Sample has paired normal tissue? |      |           |      | Mann-Whitney U test P-Value |
|-----------------------|----------------------------------|------|-----------|------|-----------------------------|
|                       | Yes (N=44)                       |      | No (N=20) |      |                             |
|                       | Mean                             | SD   | Mean      | SD   |                             |
| MMP2 H score          | 172                              | 73   | 161       | 93   | 0.62                        |
| MMP9 H score          | 81                               | 55   | 74        | 59   | 0.54                        |
| MMP14 H score         | 147                              | 60   | 146       | 74   | 0.57                        |
| Collagen IV intensity | 22854                            | 2969 | 23157     | 4112 | 0.95                        |

**Supplementary Figure S2. Marker distribution in LCIS according to availability of paired normal tissue.** Panels a-d show H score (MMP2, MMP9, MMP14) or expression intensity (collagen IV) distributions stratified by whether the patient had normal breast tissue available for analysis. For each marker, distributions are similar between the two groups. Further, mean values of marker expression did not differ significantly for any of the markers, as shown by the data in panel e.

MMP2

H score difference =29

(a)

LCIS

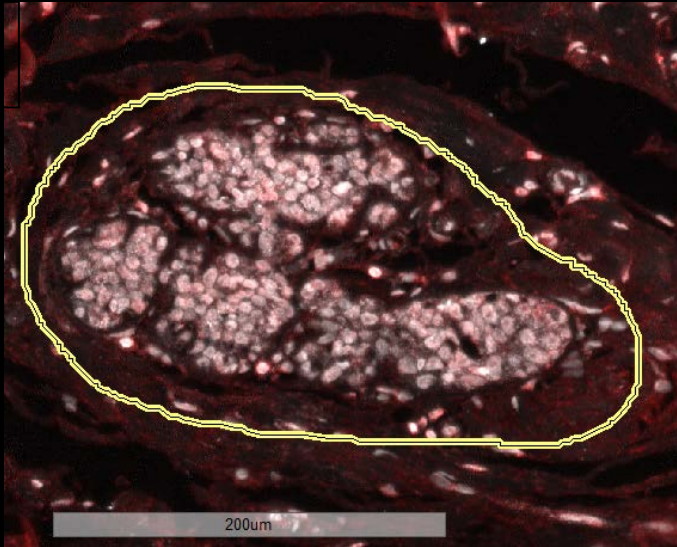

normal epithelium

(b)

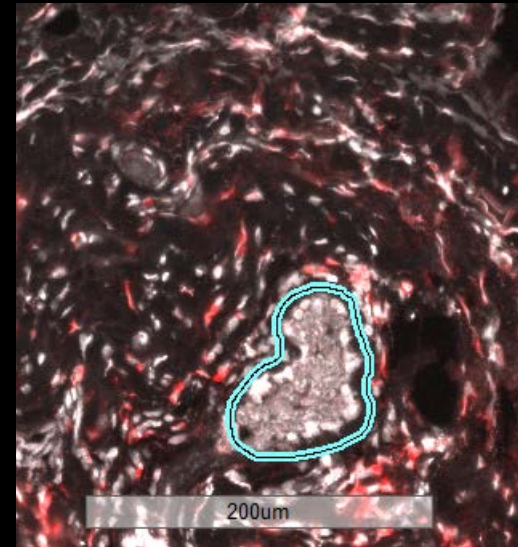

H score difference =-188

(c)

LCIS

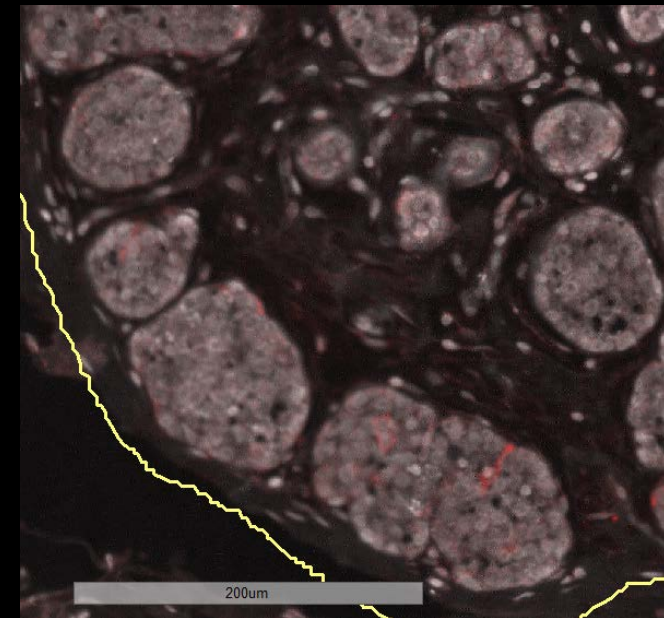

normal epithelium

(d)

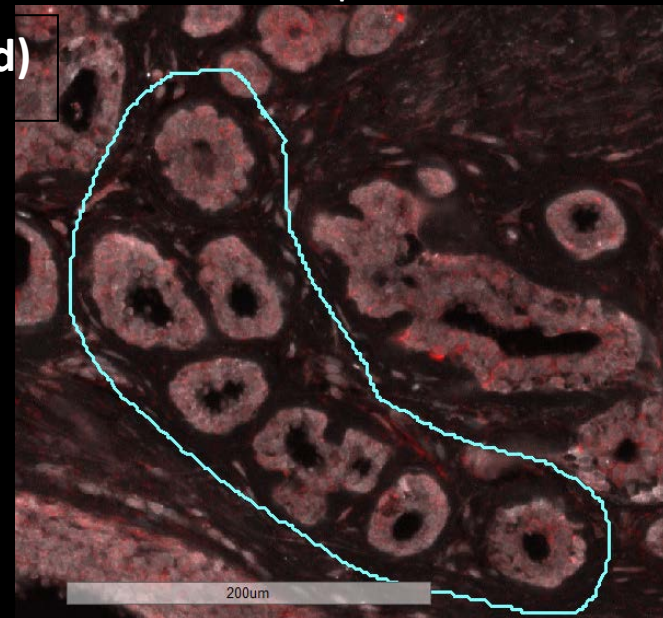



MMP9

H score difference =2

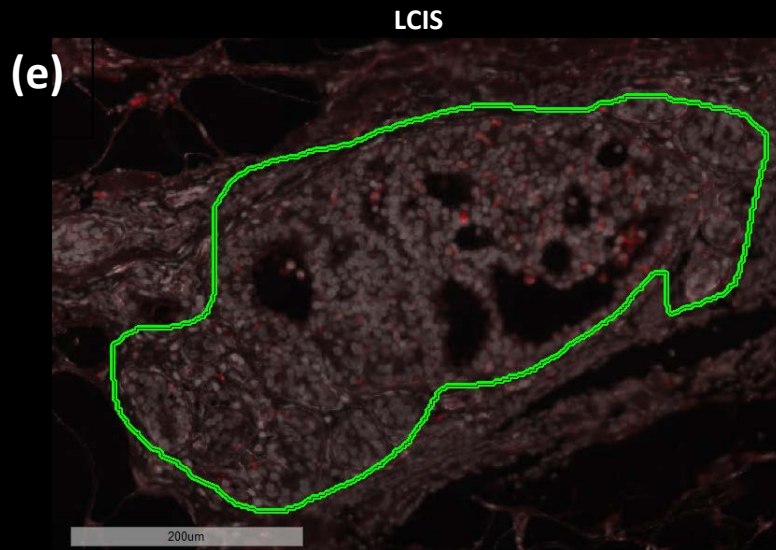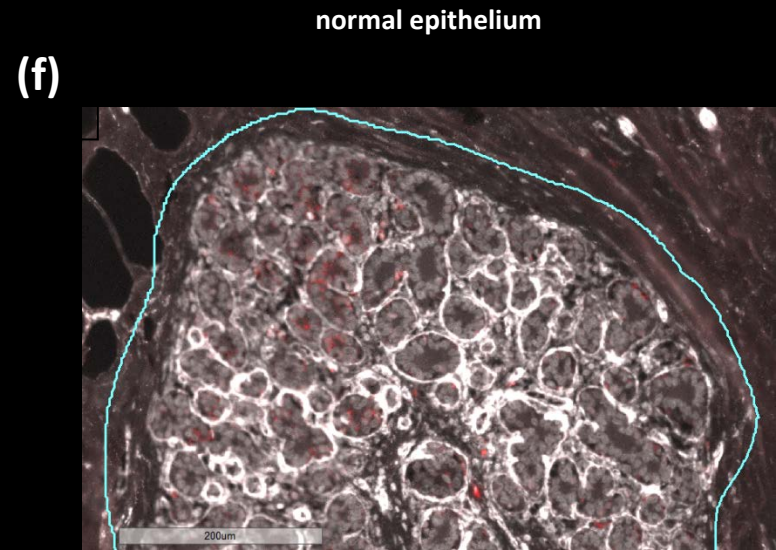

H score difference =67

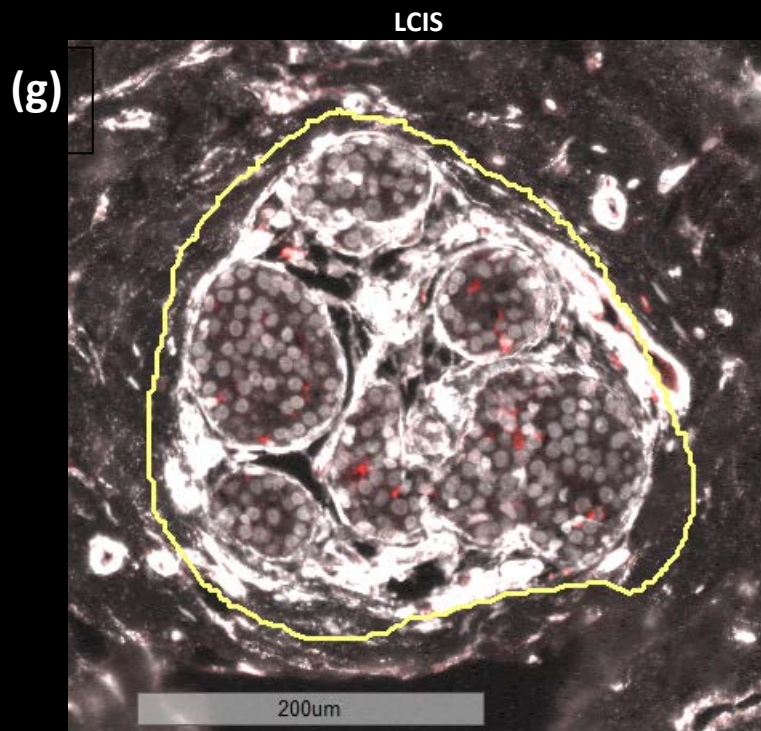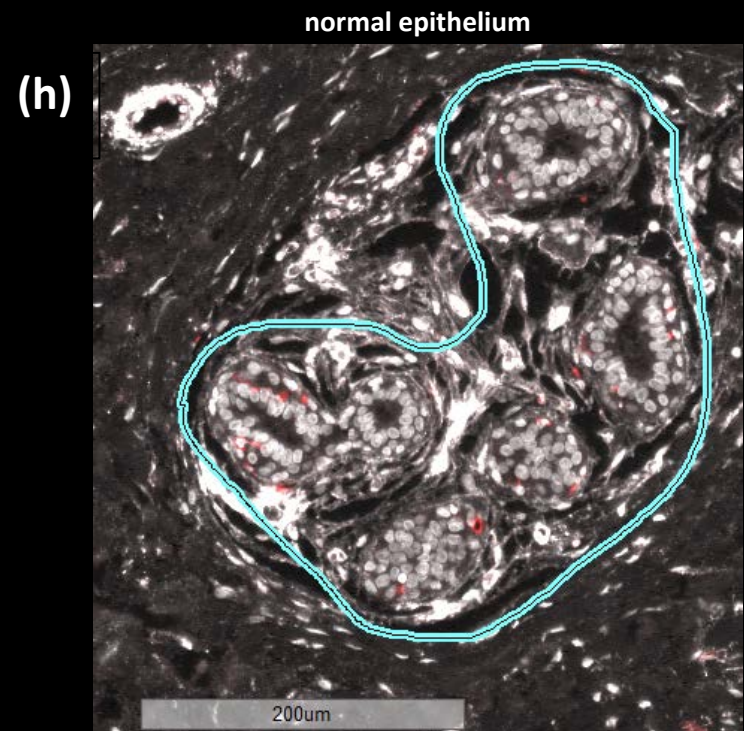



MMP14

H score difference =3

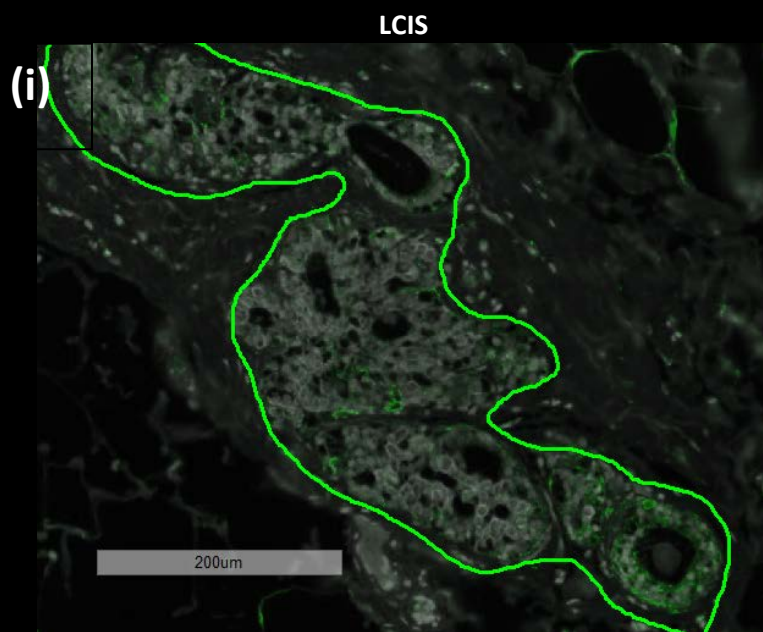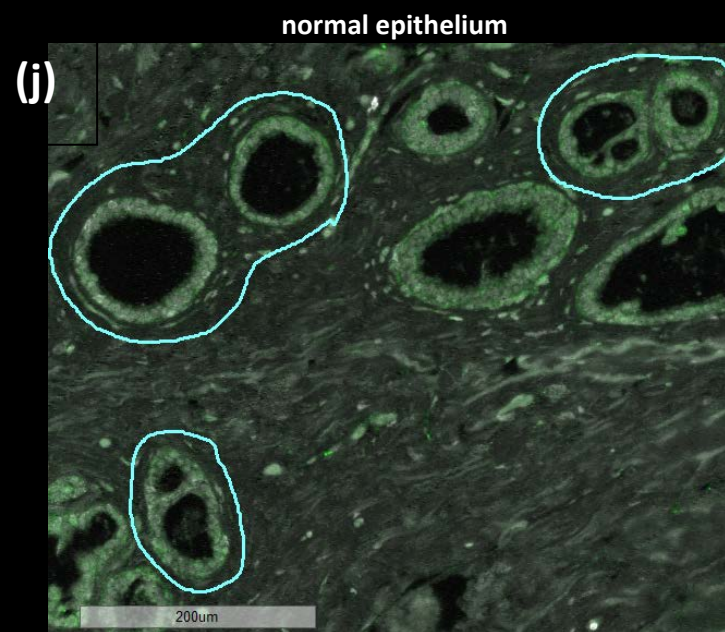

H score difference =114

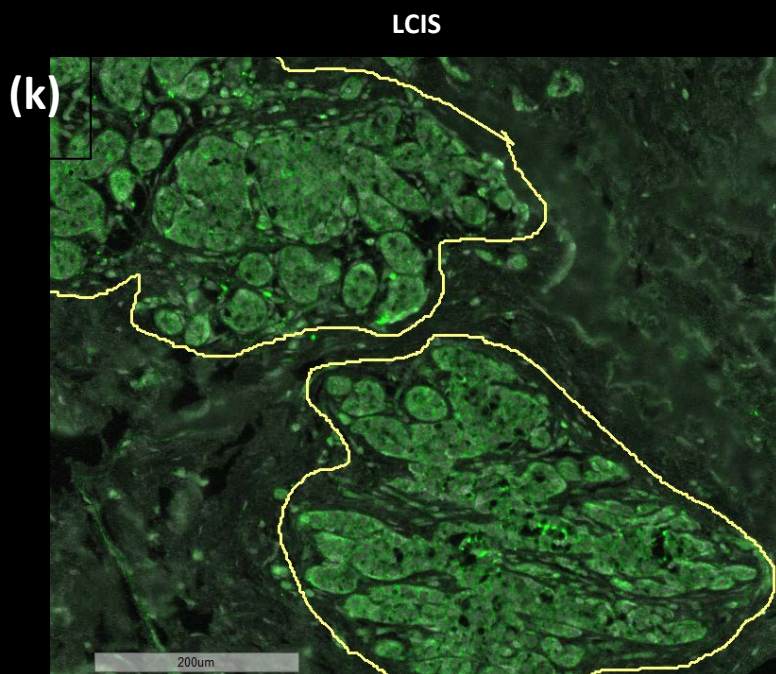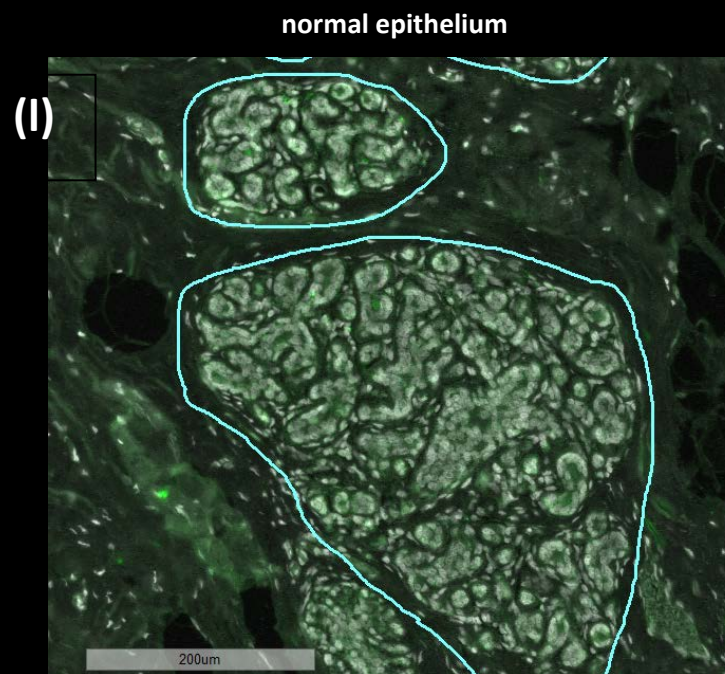



Collagen IV

LCIS

normal epithelium

Intensity difference = -103

(m)

(n)

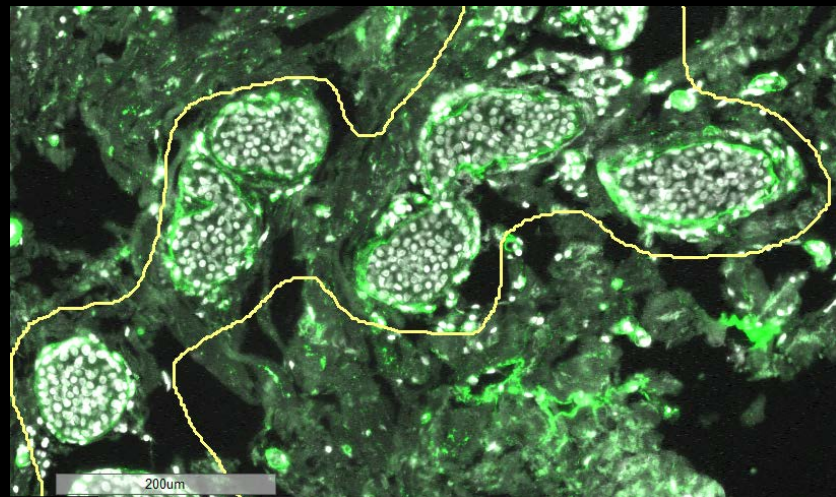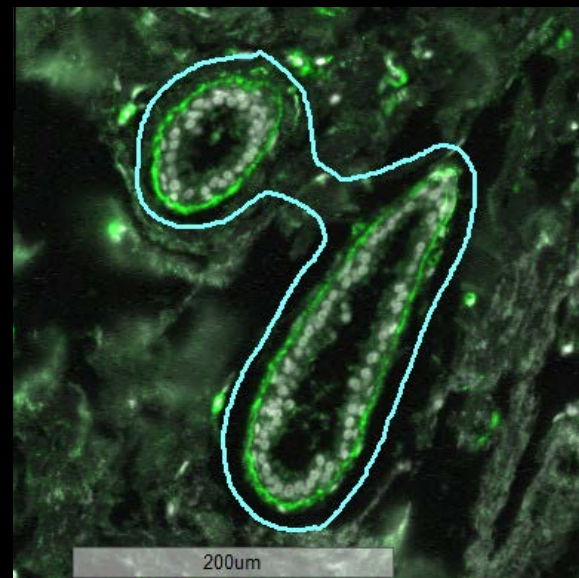

Intensity difference = 9809

(o)

(p)

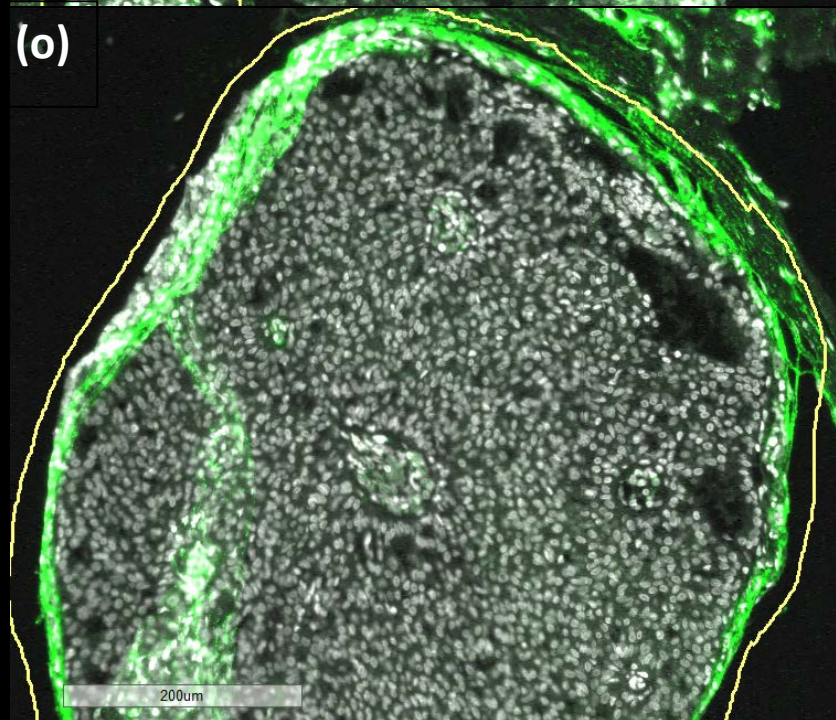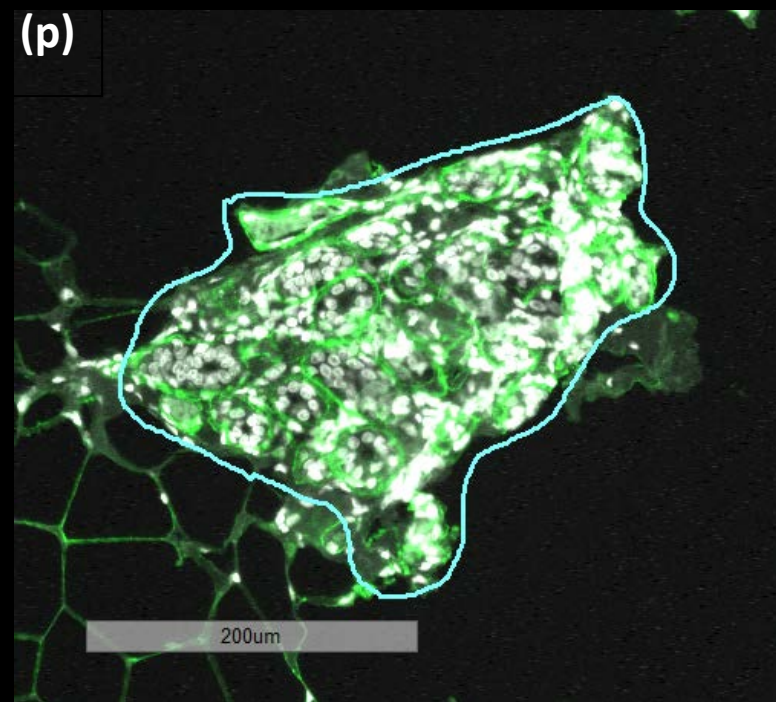

**Supplementary Figure S3. Example images of MMP and collagen IV staining in LCIS and paired normal breast tissue.** Examples of concordant (*i.e.*, low difference in H scores) and discordant (*i.e.*, high difference in H scores) levels of MMP and collagen IV expression are shown above. Panels a-d show representative staining for MMP2; panels e-h show representative staining for MMP9; panels i-l show representative staining for MMP14; and panels m-p show representative staining for collagen IV. The images shown are examples of representative areas. However, the H score and intensity (and therefore the differences) are calculated based on regions of interest (circled in yellow [LCIS] or blue [normal]) across the whole slide.
